# Supplementary material
Source: HighWire-hosted journal article supplement (https://erj.ersjournals.com/content/57/4/2003961)
Supplement: inline-supplementary-material-1 [file inline-supplementary-material-1.pdf]

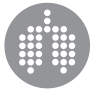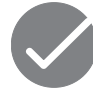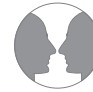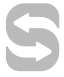

SHAREABLE PDF

# Head-to-head comparison of SARS-CoV-2 antigen-detecting rapid test with self-collected nasal swab *versus* professional-collected nasopharyngeal swab

Andreas K. Lindner<sup>1,8</sup>, Olga Nikolai<sup>1,8</sup>, Franka Kausch<sup>1</sup>, Mia Wintel<sup>1</sup>, Franziska Hommes<sup>1</sup>, Maximilian Gertler <sup>1</sup>, Lisa J. Krüger<sup>2</sup>, Mary Gaeddert <sup>2</sup>, Frank Tobian<sup>2</sup>, Federica Lainati<sup>2</sup>, Lisa Köppel<sup>2</sup>, Joachim Seybold <sup>3</sup>, Victor M. Corman <sup>4,5</sup>, Christian Drosten<sup>4,5</sup>, Jörg Hofmann<sup>6</sup>, Jilian A. Sacks<sup>7</sup>, Frank P. Mockenhaupt <sup>1,9</sup> and Claudia M. Denkinger<sup>2,9</sup>

**Affiliations:** <sup>1</sup>Charité – Universitätsmedizin Berlin, corporate member of Freie Universität Berlin, Humboldt – Universität zu Berlin, and Berlin Institute of Health, Institute of Tropical Medicine and International Health, Berlin, Germany. <sup>2</sup>Division of Clinical Tropical Medicine, Center of Infectious Diseases, Heidelberg University Hospital, Heidelberg, Germany. <sup>3</sup>Charité – Universitätsmedizin Berlin, corporate member of Freie Universität Berlin, Humboldt – Universität zu Berlin, and Berlin Institute of Health, Medical Directorate, Berlin, Germany. <sup>4</sup>Charité – Universitätsmedizin Berlin, corporate member of Freie Universität Berlin, Humboldt – Universität zu Berlin, and Berlin Institute of Health, Institute of Virology, Berlin, Germany. <sup>5</sup>German Centre for Infection Research (DZIF), Berlin, Germany. <sup>6</sup>Labor Berlin – Charité Vivantes GmbH, Berlin, Germany. <sup>7</sup>Foundation for Innovative New Diagnostics, Geneva, Switzerland. <sup>8</sup>Authors contributed equally. <sup>9</sup>Authors contributed equally.

**Correspondence:** Claudia M. Denkinger, Division of Clinical Tropical Medicine, Heidelberg University Hospital, Im Neuenheimer Feld 672, 69120 Heidelberg, Germany. E-mail: claudia.denkinger@uni-heidelberg.de

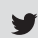

@ERSpublications

**Supervised nasal self-sampling is a reliable alternative to professional nasopharyngeal sampling using a WHO-listed SARS-CoV-2 antigen-detecting rapid test. Self-sampling and potentially patient self-testing may be a future use case.** <https://bit.ly/3mup0hS>

**Cite this article as:** Lindner AK, Nikolai O, Kausch F, *et al.* Head-to-head comparison of SARS-CoV-2 antigen-detecting rapid test with self-collected nasal swab *versus* professional-collected nasopharyngeal swab. *Eur Respir J* 2021; 57: 2003961 [<https://doi.org/10.1183/13993003.03961-2020>].

This single-page version can be shared freely online.

*To the Editor:*

A number of antigen-detecting rapid diagnostic tests (Ag-RDTs) for severe acute respiratory syndrome coronavirus 2 (SARS-CoV-2) are now commercially available and can result in rapid decisions on patient care, isolation and contact tracing at the point of care [1]. Two Ag-RDTs using nasopharyngeal (NP) swab samples meet World Health Organization (WHO) targets and are now approved through the WHO Emergency Use Listing procedure [2–4].
